# Supplementary material
Source: PubMed Central journal article supplement (PMC7410074)
Supplement: jci-130-131297-s385.pdf [file jci-130-131297-s385.pdf]

Supplemental Table 1.  
 Clinical features of  
 CTNNBL1 466<sup>V/V</sup> patient.

| Patient:         |                                                              |
|------------------|--------------------------------------------------------------|
| <i>CTNNBL1</i>   | Chr20:36488304_A>G:<br>c.A1396G:p.M466V<br>(hg19, NM_030877) |
|                  |                                                              |
| Age presentation | 2 years                                                      |
| Sex              | F                                                            |
| Infections:      | Sinopulmonary<br>HSV                                         |
| Skin             | Herpes Simplex V2<br>facial lesions<br>Vitiligo              |
| Hematology       | Thrombocytopenia                                             |
| Endocrine        | Hypothyroidism<br>Growth delay – now resolved                |



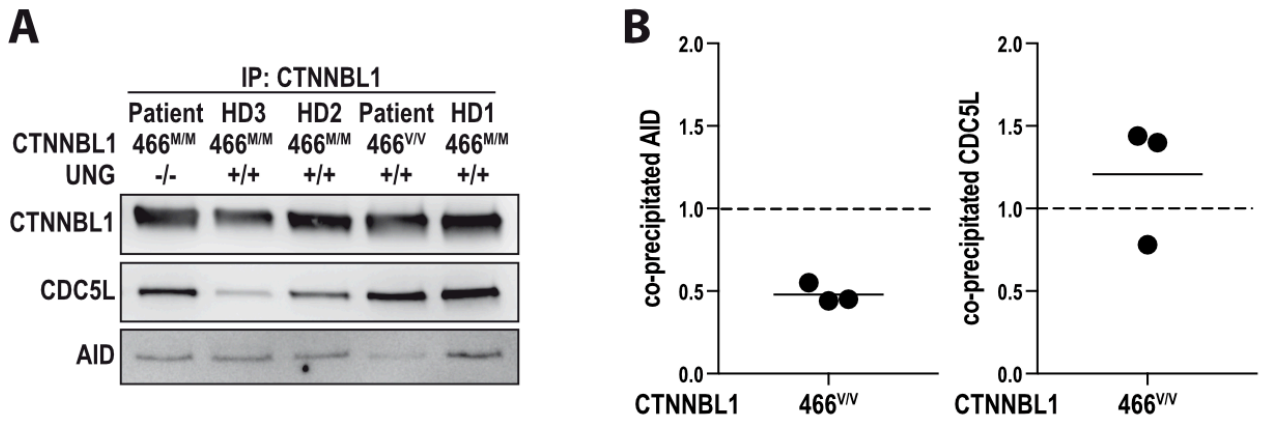

**Supplemental Figure 2. UNG-deficient B cells do not display reduced interaction of CTNNBL1 and AID.** (A) Lysates from EBV BLCLs from healthy donors (HD), patient carrying the 466V mutation, and UNG-deficient patient were subjected to immune precipitation with anti-CTNNBL1 antibody; precipitates were analyzed by immune blotting with indicated antibodies. (B) Densitometric quantification. Represented are values relative to UNG deficient cells (dashed lines); bar represents mean.

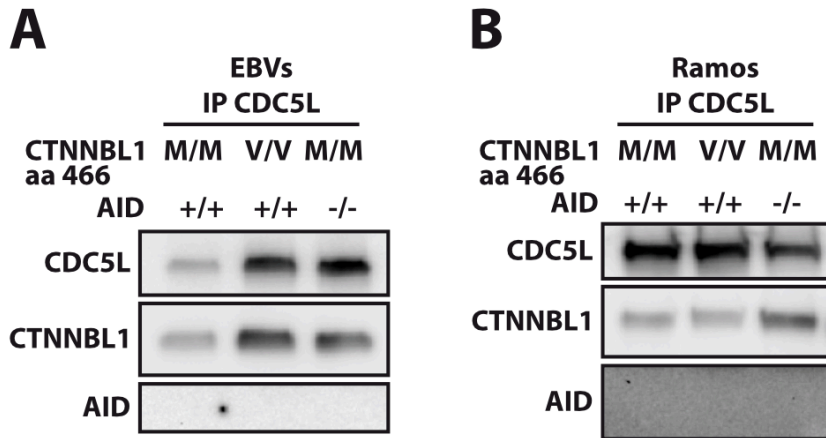

**Supplemental Figure 3. AID and CDC5L form distinct complexes with CTNNBL1.** Lysates of (A) EBV BLCLs from healthy donor (HD), CTNNBL1 466<sup>V/V</sup> patient, or AID-deficient patient or (B) parental WT, CTNNBL1 466<sup>V/V</sup>, and AID<sup>-/-</sup> Ramos B cells were subjected to immune precipitation with anti-CDC5L antibody; precipitates and total cell lysates were analyzed by immune blotting with indicated antibodies.

**A**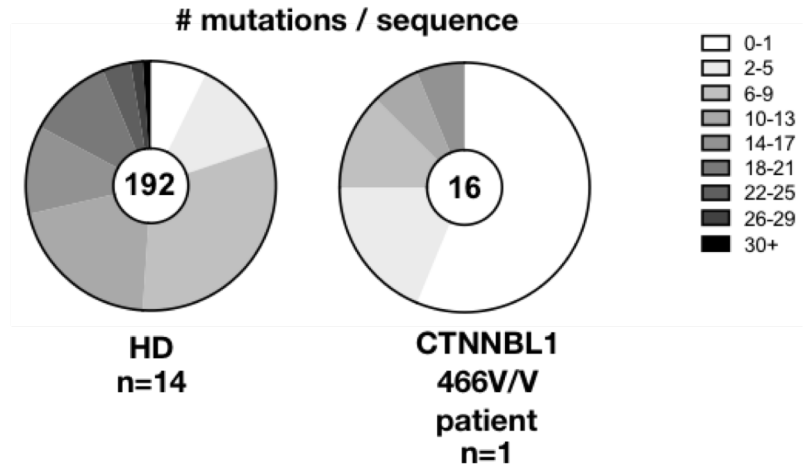**B**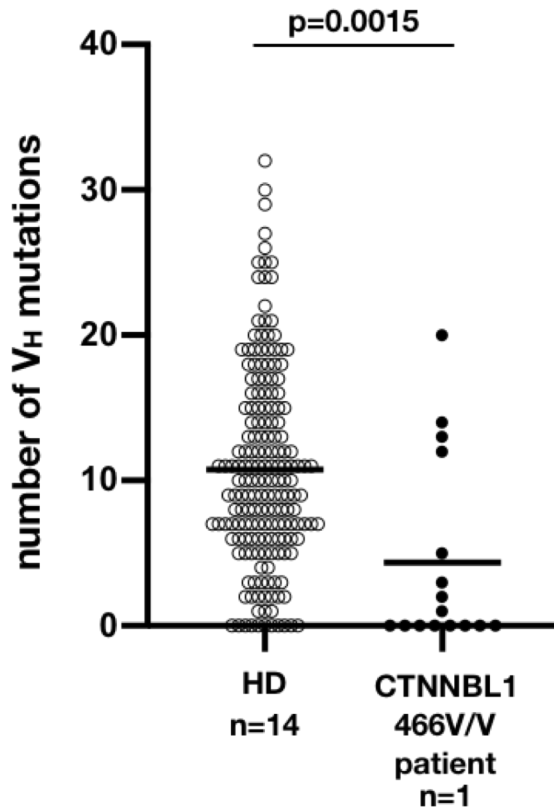

**Supplemental Figure 4. Decreased SHM in CD27<sup>+</sup>IgM<sup>+</sup> B cells from the CTNNBL1 466<sup>V/V</sup> patient.** (A) Distribution of number of mutations per  $V_H$  sequence and (B) number of mutations evaluated in  $V_H$  sequences derived from single CD27<sup>+</sup>IgM<sup>+</sup> B cells from healthy donors (HD, n=14) and the CTNNBL1 466<sup>V/V</sup> patient is shown. Bar represents mean. P values were obtained with unpaired two-tailed Student's t-test.

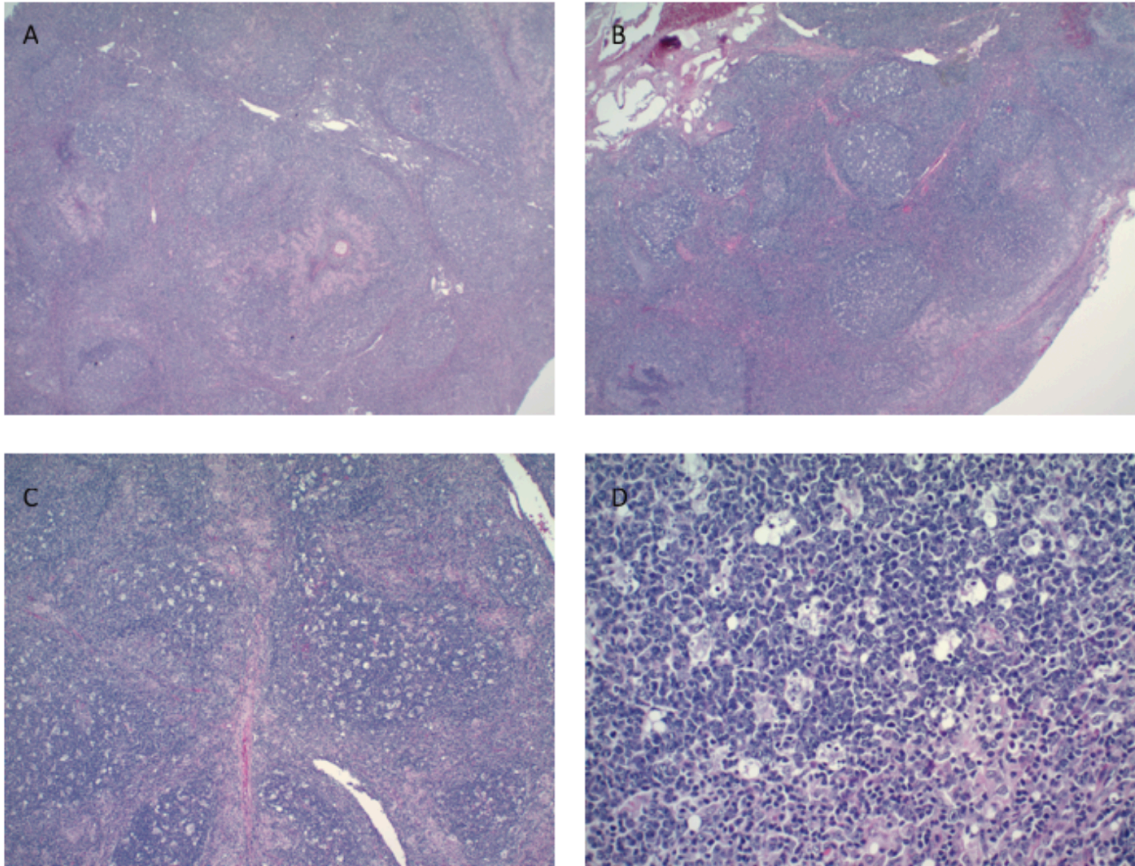

**E**

gated on CD19<sup>hi</sup> CD21<sup>-lo</sup> CD10<sup>-</sup> CD27<sup>-</sup>

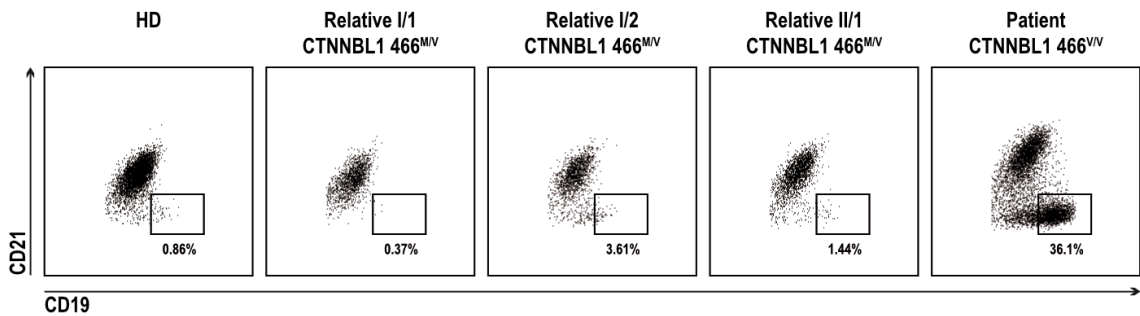

**Supplemental Figure 5. Lymphadenopathy and expanded CD19<sup>hi</sup>CD21<sup>-lo</sup>CD10<sup>-</sup>CD27<sup>-</sup> B cells in the CTNNBL1 466<sup>V/V</sup> patient.** (A) Lymph node architecture shows expanded and distorted follicles with surrounding epithelioid histiocytes in loose clusters 20x; (B) some areas demonstrate follicular hyperplasia with back-to-back follicles 20x; (C) there is attenuation of the mantle zones and some coalescent follicles 40x; (D) germinal centers show prominent tingible body macrophages with some peripheral epithelioid histiocytes 200x. (E) Dot plots of PBMCs from a representative healthy donor (HD), asymptomatic CTNNBL1 466<sup>M/V</sup> relatives, and CTNNBL1 466<sup>V/V</sup> patient, gated on CD19<sup>hi</sup>CD21<sup>-lo</sup>CD10<sup>-</sup>CD27<sup>-</sup>.

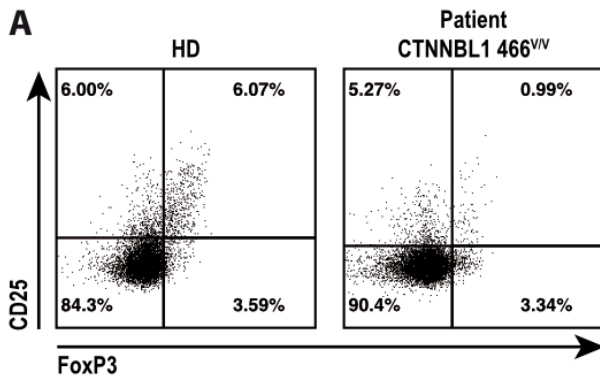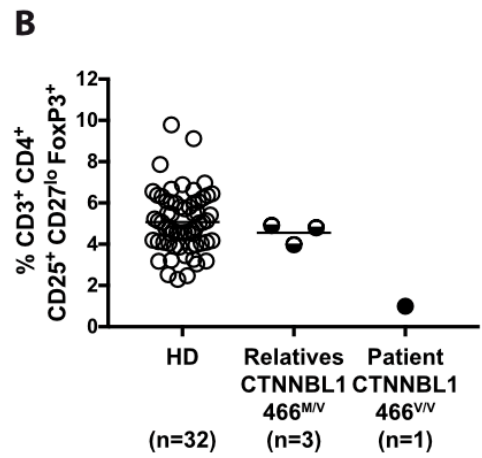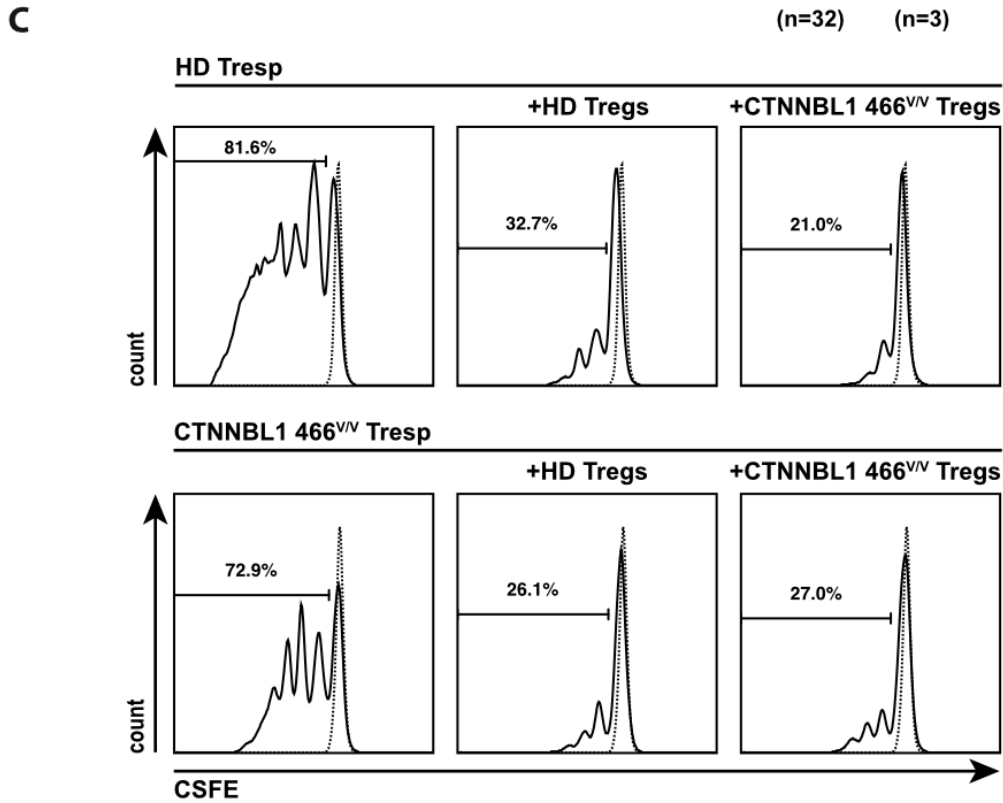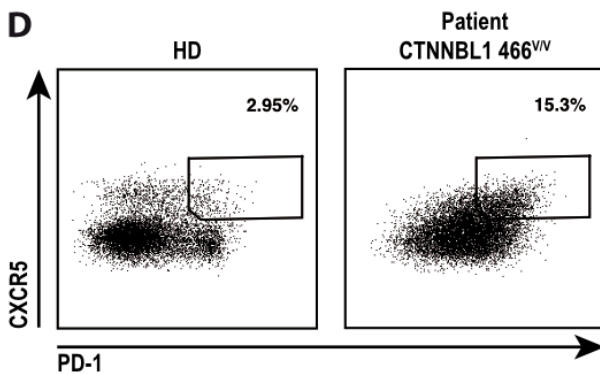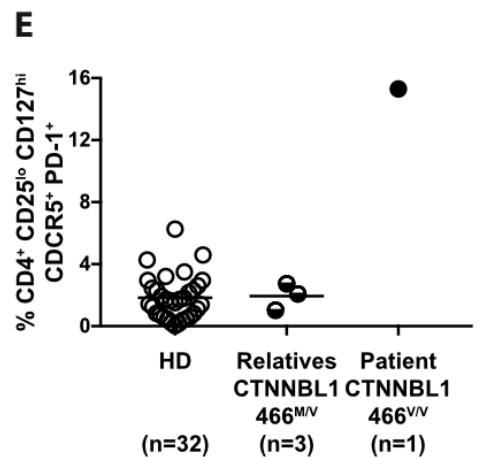

**Supplemental Figure 6. Altered frequencies of CD3<sup>+</sup>CD4<sup>+</sup>CD25<sup>hi</sup>CD127<sup>-/lo</sup>FOXP3<sup>+</sup> Treg and circulating CD3<sup>+</sup>CD4<sup>+</sup>CXCR5<sup>+</sup>PD-1<sup>hi</sup> Tfh-like in the CTNNBL1 466<sup>V/V</sup> patient. (A)** Dot plots of CD25 and FOXP3 expression in CD3<sup>+</sup>CD4<sup>+</sup>CD127<sup>-/lo</sup> T cells from a representative healthy donor (HD) and the CTNNBL1 466<sup>V/V</sup> patient. (B) Frequency of CD3<sup>+</sup>CD4<sup>+</sup>CD25<sup>hi</sup>CD127<sup>-/lo</sup>FOXP3<sup>+</sup> regulatory T cells (Treg) in 32 HDs, 3 patient's relatives (CTNNBL1 466<sup>M/V</sup>), and the CTNNBL1 466<sup>V/V</sup> patient. Bar indicates mean. (C) Histograms of heterologous CFSE-labeled HD T responder cell (Tresp) proliferation on day 4 co-cultured with CD3<sup>+</sup>CD4<sup>+</sup>CD25<sup>hi</sup>CD127<sup>-/lo</sup> Tregs from a HD or the CTNNBL1 466<sup>V/V</sup> patient. Dashed lines show unstimulated Tresp. (D) Dot plots of CXCR5 and PD-1 expression on CD3<sup>+</sup>CD4<sup>+</sup> T cells from a representative HD and the CTNNBL1 466<sup>V/V</sup> patient. (E) Frequency of circulating CD3<sup>+</sup>CD4<sup>+</sup>CXCR5<sup>+</sup>PD-1<sup>hi</sup> T follicular helper (Tfh)-like in 32 HDs, 3 unaffected relatives (CTNNBL1 466<sup>M/V</sup>), and the CTNNBL1 466<sup>V/V</sup> patient.
